# Supplementary material for: Crystal Structure of the Pleckstrin Homology Domain from the Ceramide Transfer Protein: Implications for Conformational Change upon Ligand Binding
Source: PubMed Central journal article supplement (PMC3832616; doi:10.1371/journal.pone.0079590), 2013-11-18
Supplement: pone.0079590.s001.pdf [file pone.0079590.s001.pdf]

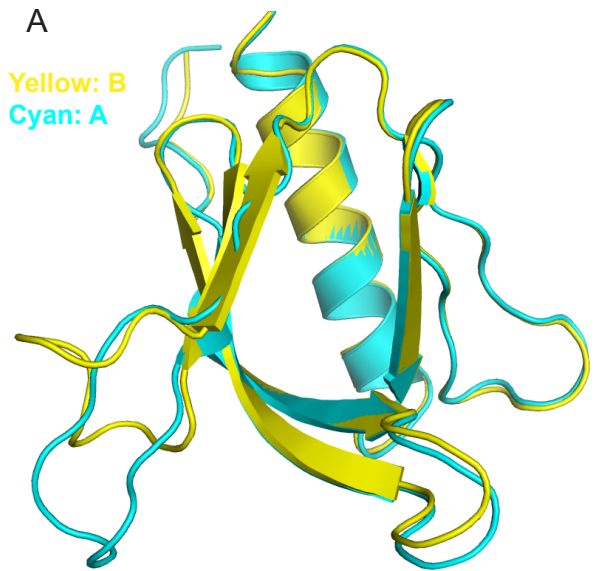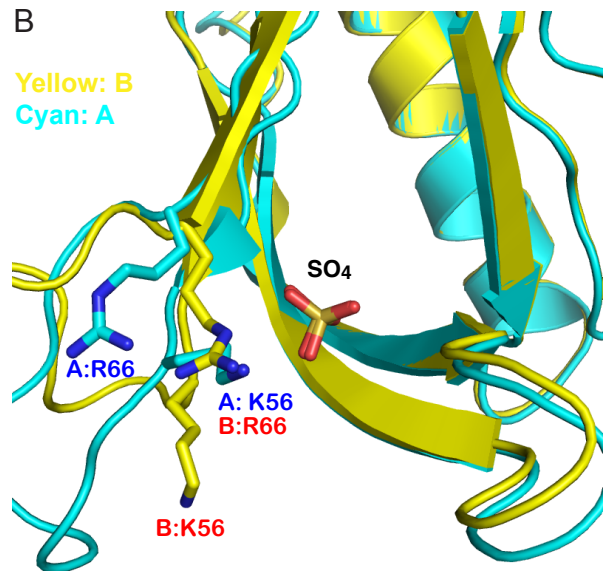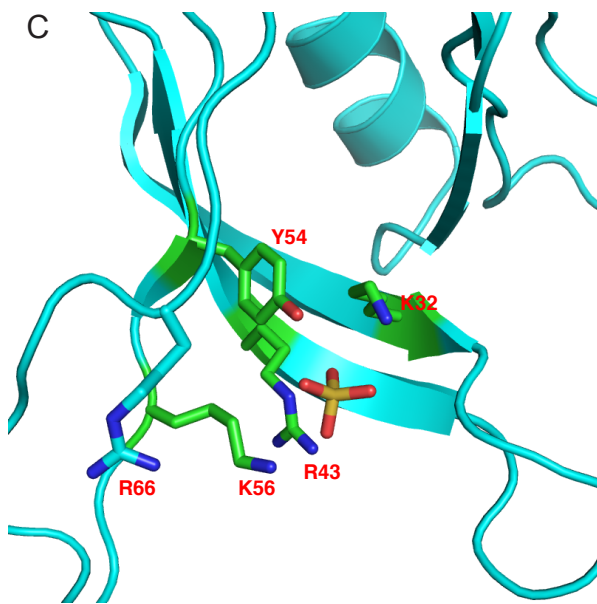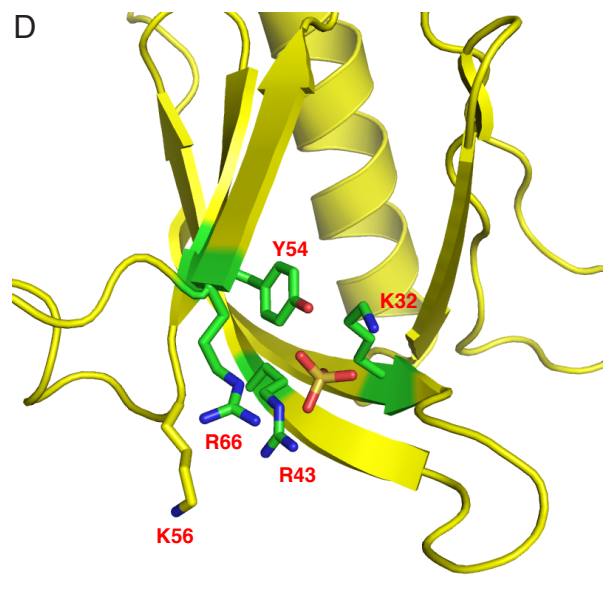

Figure S1
