# Supplementary material for: Crystal Structure of the Pleckstrin Homology Domain from the Ceramide Transfer Protein: Implications for Conformational Change upon Ligand Binding
Source: PubMed Central journal article supplement (PMC3832616; doi:10.1371/journal.pone.0079590), 2013-11-18
Supplement: pone.0079590.s004.pdf [file pone.0079590.s004.pdf]

|        |           |             |                |          |
|--------|-----------|-------------|----------------|----------|
|        | 20        | 30          | 40             | 50       |
| hCERT  | ...GPPVER | CGVLSKWTNY. | IHGNDRWFVVLKN  | ..NALSY  |
| hFAPP1 | GPLGSPEFM | EGVLYKWTNY. | LTGNQPRWFVLDN  | ..GILSY  |
| hFAPP2 | .....M    | EGVLYKWTNY. | LSGNQPRWFVLCG  | ..GILSY  |
| hOSBP1 | .....SAR  | EGWLFKWTNY. | IKGYQRRWFVLSN  | ..GLLSY  |
| hORP3  | .....PVQK | GFLLKRRKWP  | LKGNHKKRFVLDK  | ..GILKY  |
| hORP4L | .....DSF  | EGWLLKWTNY. | LKGYQRRWFVLDN  | ..GLLSY  |
| hORP6  | .....DKH  | EGFMLKRRKWP | LKGNHKKRFVLDN  | ..GMLKY  |
| hORP7  | .....ERQ  | EGHLLKRRKWP | LKGNHKKRYFVLED | ..GILHY  |
| hORP9  | .....SIM  | EGPLSKWTNV. | MKGNQYRWFVLDY  | NAGLLSY  |
| hORP10 | .....PAL  | EGVLSKYTNL. | LQGNQNYRWFVLD  | FEAGILQY |
| hORP11 | .....ENVY | GYLMKYTNL.  | VTGNQYRWFVLDN  | NEAGLLEY |

|        |               |                |            |            |
|--------|---------------|----------------|------------|------------|
|        | 60            | 70             | 80         | 90         |
| hCERT  | YKSEDETEYGC   | R.GSITCLSKAVIT | PHDFDECRFD | DISVN.D    |
| hFAPP1 | YDSQDDVCKGSK  | .GSIKMAVCEIKV  | HSDNTRMELI | IPGE       |
| hFAPP2 | YDSPEDAWKGC   | .GSIQMAVCEIQV  | HSDNTRMDLI | IPGE       |
| hOSBP1 | YRSKAEMRHTC   | R.GTINLATANIT  | VE..DSCNFI | ISNGGA     |
| hORP3  | AKSQTDIEREKLH | GCIDVGLSVMSV   | KK.SSKCIDL | DTE.E      |
| hORP4L | YRNQGEAHTC    | R.GTINLSTAHID  | TE..DSCGIL | ITSG.A     |
| hORP6  | SKAPLDIQKGKVH | GSIDVGLSVMSI   | KK.KARRIDL | DTE.E      |
| hORP7  | ATTRQDITKGLH  | GSIDVRLSVMSI   | NK.KAQRIDL | DTE.D      |
| hORP9  | YTSKDKMMRGS   | RRGCVRLRGA     | VIGIDDED   | STFTITVD.Q |
| hORP10 | FVNEQSKHQKPR  | .GVLSSLGAVS    | LSDEAPHMLV | VYSANG     |
| hORP11 | FVNEQSRNQKPR  | .GTLQLAGAVI    | SPSDEDSHT  | FTVNAASG   |

|        |             |            |                 |
|--------|-------------|------------|-----------------|
|        | 100         | 110        | 120             |
| hCERT  | SVWYLRAQDPD | HROQWIDAI  | EQHKTESG....    |
| hFAPP1 | QHFYMKAVNAA | ERQRWLVAL  | GSSKASLTDTRT    |
| hFAPP2 | QYFYLKARSVA | ERQRWLVAL  | GSAKACL.....    |
| hOSBP1 | QTYHLKASS   | SEVERQRWVA | EELAKAKA.....   |
| hORP3  | HIYHLKVKSE  | EEVFDEWVSK | LRHHRMYR.....   |
| hORP4L | RSYHLKASS   | SEVDRQQWIT | AELAKAKA.....   |
| hORP6  | HIYHLKVKSQ  | DWFDAWVSK  | LRHHRLYR.....   |
| hORP7  | NIYHLKIKSQ  | DLFQSWVAQ  | LRAHRLAH.....   |
| hORP9  | KTFFHFQARD  | ADEREKWIHA | EETILRH.....    |
| hORP10 | EMFKLRAAD   | AKEKQFWTQ  | LRAKAYH.....    |
| hORP11 | EQYKLRAAT   | DAKERQHWV  | SRLOICTQHH..... |

Figure S4
